CORRECTION

# Correction: Threshold Games and Cooperation on Multiplayer Graphs

**Kaare B. Mikkelsen, Lars A. Bach**

The affiliation for the second author is incorrect. Lars A. Bach is affiliated with: **1** Interacting Minds Center, Aarhus University, DK-8000 Aarhus C, Denmark, **3** Interdisciplinary Center for Organizational Architecture(ICOA), Aarhus University, DK-8210 Aarhus V, Denmark

The Data Availability statement for this paper is incorrect. The correct statement is: All relevant data are within the paper and Supporting Information files.

## Reference

1. Mikkelsen KB, Bach LA (2016) Threshold Games and Cooperation on Multiplayer Graphs. PLoS ONE 11(2): e0147207. doi: [10.1371/journal.pone.0147207](https://doi.org/10.1371/journal.pone.0147207) PMID: [26844547](https://pubmed.ncbi.nlm.nih.gov/26844547/)

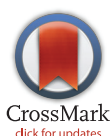

## OPEN ACCESS

**Citation:** Mikkelsen KB, Bach LA (2016) Correction: Threshold Games and Cooperation on Multiplayer Graphs. PLoS ONE 11(3): e0152340. doi:10.1371/journal.pone.0152340

**Published:** March 21, 2016

**Copyright:** © 2016 Mikkelsen, Bach. This is an open access article distributed under the terms of the [Creative Commons Attribution License](https://creativecommons.org/licenses/by/4.0/), which permits unrestricted use, distribution, and reproduction in any medium, provided the original author and source are credited.
